# Supplementary material for: Conflict hotspot trajectories and immunization coverage in Nigeria: A descriptive spatial analysis of ACLED and DHS data from 2010 to 2024
Source: Research Square preprint supplement (doi:10.21203/rs.3.rs-7809165/v1), 2025-11-07
Supplement: Supplementary file 1 [file 20f6a7c7d29e12884c5976d1.docx]

# =============================================================================

# Supplementary Analysis Code

# Title: Conflict hotspot trajectories and immunization coverage in Nigeria:

# A descriptive spatial analysis of ACLED and DHS data from 2010 to 2024

# Version: 1.0

# Date: 2025-10-06

# Purpose: Reproduce data abstraction, preparation, and analyses used in the paper.

# Notes:

# - Relative paths only (no local machine paths).

# - Inputs expected under ./raw_data; outputs written to ./output and subfolders.

# How to run:

# - Set working directory to project root (contains raw_data/).

# - Run: source("Supplementary_Analysis_Nigeria_Conflict_DTP3_2010_2024_v1.0.R")

# =============================================================================

suppressPackageStartupMessages({

pkgs <- c("sf","readr","readxl","dplyr","stringr","purrr","lubridate",

"janitor","spdep","tmap","ggplot2","tidyr","tibble")

need <- setdiff(pkgs, rownames(installed.packages()))

if (length(need)) install.packages(need, quiet = TRUE)

invisible(lapply(pkgs, require, character.only = TRUE))

})

# ---- Controls ----------------------------------------------------------------

years_keep <- 2010:2024

z_cut <- 1.96 # Local Gi* hotspot threshold (use 1.64 for 90%)

violent_types <- c("Battles","Explosions/Remote violence",

"Violence against civilians","Strategic developments")

# ---- Paths (relative only) ---------------------------------------------------

acled_path <- "raw_data/acled_nigeria.csv"

admin1_path <- "raw_data/ng_admin1.gpkg" # layer "gadm36_NGA_1"

dtp3_path <- "raw_data/dhs2018_dtp3_ng.csv" # (state_name, dtp3)

dir.create("output", showWarnings = FALSE)

dir.create("output/tables", showWarnings = FALSE)

# ---- Geography (ADM1) --------------------------------------------------------

ng_admin1 <- sf::read_sf(admin1_path, layer = "gadm36_NGA_1") |>

sf::st_make_valid() |>

sf::st_transform(4326)

id_col <- if ("GID_1" %in% names(ng_admin1)) "GID_1" else names(ng_admin1)[1]

name_col <- if ("NAME_1" %in% names(ng_admin1)) "NAME_1" else names(ng_admin1)[2]

ng_admin1 <- ng_admin1 |>

dplyr::mutate(

admin1_id = .data[[id_col]],

state_name = stringr::str_to_title(.data[[name_col]])

) |>

dplyr::select(admin1_id, state_name, dplyr::everything())

# ---- Helper: ensure DTP3 CSV exists (derive from STATcompiler Excel if needed)

ensure_dtp3_csv <- function(dtp3_csv, ng_admin1_sf) {

if (file.exists(dtp3_csv)) return(invisible(TRUE))

# look for a STATcompiler Excel in raw_data/

xls <- list.files("raw_data", pattern = "^STATcompiler.*\\.(xlsx|xls)$", full.names = TRUE)

if (!length(xls)) {

stop("Missing DTP3 CSV (", dtp3_csv, ") and no STATcompiler Excel found in raw_data/.")

}

xls <- xls[1] # take the first match

# canonical state list from ADM1 (title case)

name_col <- if ("NAME_1" %in% names(ng_admin1_sf)) "NAME_1" else names(ng_admin1_sf)[2]

states_canon <- ng_admin1_sf |>

sf::st_drop_geometry() |>

dplyr::pull(!!name_col) |>

stringr::str_to_title() |>

unique() |>

sort()

# normalizer to match STATcompiler quirks to GADM names

norm_state <- function(x) {

x <- tolower(x)

x <- gsub("^\\s*states\\s*:\\s*", "", x) # strip "States :"

x <- gsub("\\(l2\\)$", "", x) # strip "(L2)"

x <- gsub("^\\.+\\s*", "", x) # strip leading ".."

x <- gsub("[^a-z ]+", " ", x) # letters/spaces only

x <- gsub("\\s+", " ", x)

x <- trimws(x)

x <- sub("^fct abuja$", "federal capital territory", x)

x <- sub("^abuja fct$", "federal capital territory", x)

x <- sub("^abuja$", "federal capital territory", x)

x <- sub("^nassarawa$", "nasarawa", x) # Excel variant -> canonical

x

}

canon_norm <- norm_state(states_canon)

# read sheet 1 as text; build a row string per row; hunt for a 0–100 column

df <- readxl::read_excel(xls, sheet = 1, col_types = "text") |> janitor::clean_names()

if (!nrow(df)) stop("STATcompiler workbook has no rows on sheet 1: ", basename(xls))

# score columns for "0..100 numeric content" to pick a value column

score_pct <- function(v) {

x <- suppressWarnings(as.numeric(v)); sum(is.finite(x) & x >= 0 & x <= 100)

}

scores <- sapply(df, score_pct)

if (all(scores == 0)) stop("Could not find a 0–100 percentage column in the STATcompiler sheet.")

val_col <- names(scores)[which.max(scores)]

# build a single search string per row

row_str <- apply(df, 1, function(r) stringr::str_squish(tolower(paste(r, collapse = " "))))

# extract a DTP3 % per state

out <- lapply(states_canon, function(st) {

terms <- tolower(st)

if (st == "Federal Capital Territory") terms <- c(terms, "fct abuja", "abuja fct", "abuja")

pats <- paste0("\\b", terms, "\\b", collapse = "|")

hit <- grep(pats, row_str, perl = TRUE)

if (!length(hit)) return(NULL)

v <- suppressWarnings(as.numeric(df[[val_col]][hit[1]]))

if (!is.finite(v) || v < 0 || v > 100) return(NULL)

tibble::tibble(state_name = st, dtp3 = v)

})

dtp3_2018 <- dplyr::bind_rows(out)

if (!nrow(dtp3_2018)) {

stop("Failed to parse any state-level DTP3 values from STATcompiler Excel: ", basename(xls))

}

# harmonize to GADM spelling used in the shapefile

dtp3_2018 <- dtp3_2018 |>

dplyr::mutate(state_name = dplyr::recode(state_name,

"Nasarawa" = "Nassarawa"))

readr::write_csv(dtp3_2018, dtp3_csv)

invisible(TRUE)

}

# Create DTP3 CSV if absent, then proceed unconditionally

ensure_dtp3_csv(dtp3_path, ng_admin1)

# ---- ACLED abstraction + preparation ----------------------------------------

acled <- readr::read_csv(acled_path, show_col_types = FALSE) |>

janitor::clean_names()

# Soft-rename common ACLED headers if needed

soft_rename <- function(df, want, pattern) {

if (!want %in% names(df)) {

cand <- grep(pattern, names(df), ignore.case = TRUE, value = TRUE)[1]

if (!is.na(cand)) df <- dplyr::rename(df, !!want := dplyr::all_of(cand))

}

df

}

acled <- acled |>

soft_rename("event_type", "^event_?type$") |>

soft_rename("event_date","^event_?date$") |>

soft_rename("longitude", "^lon(gitude)?$") |>

soft_rename("latitude", "^lat(itude)?$")

acled <- acled |>

soft_rename("event_type", "^event_?type$") |>

soft_rename("event_date","^event_?date$") |>

soft_rename("longitude", "^lon(gitude)?$") ||

soft_rename("latitude", "^lat(itude)?$") |>

dplyr::mutate(

event_date = as.Date(event_date),

year = if (!"year" %in% names(acled)) lubridate::year(event_date) else as.integer(year)

) |>

dplyr::filter(!is.na(longitude), !is.na(latitude)) |>

dplyr::filter(year %in% years_keep)

if ("event_type" %in% names(acled)) {

acled <- acled |> dplyr::filter(event_type %in% violent_types)

}

# ---- Join ACLED points to states; aggregate to state-year --------------------

acled_sf <- sf::st_as_sf(acled, coords = c("longitude","latitude"), crs = 4326, remove = FALSE)

acled_join <- sf::st_join(acled_sf, ng_admin1[, c("admin1_id","state_name")], left = FALSE)

state_year <- acled_join |>

sf::st_drop_geometry() |>

dplyr::count(admin1_id, state_name, year, name = "events") |>

dplyr::arrange(year, state_name)

years <- sort(unique(state_year$year))

# ---- Spatial weights (queen) -------------------------------------------------

ng_nb <- spdep::poly2nb(as(ng_admin1, "Spatial"))

ng_listw <- spdep::nb2listw(ng_nb, style = "W", zero.policy = TRUE)

# ---- Global Moran's I per year ----------------------------------------------

global_morans <- purrr::map_dfr(years, function(y) {

dat <- ng_admin1 |>

dplyr::left_join(dplyr::filter(state_year, year == y), by = c("admin1_id","state_name")) |>

dplyr::mutate(events = tidyr::replace_na(events, 0)) |>

dplyr::arrange(match(admin1_id, ng_admin1$admin1_id)) |>

sf::st_drop_geometry()

x <- scale(dat$events)[,1]

mt <- spdep::moran.test(x, ng_listw, zero.policy = TRUE, alternative = "greater")

tibble::tibble(

year = y,

morans_i = unname(mt$estimate[["Moran I statistic"]]),

expected_i = unname(mt$estimate[["Expectation"]]),

variance = unname(mt$estimate[["Variance"]]),

p_value = mt$p.value,

n_states = nrow(dat)

)

})

readr::write_csv(global_morans, "output/global_morans.csv")

# ---- Local Gi* per year + hotspot prevalence --------------------------------

gi_results <- list()

hotshare <- numeric(0)

for (y in years) {

dat <- ng_admin1 |>

dplyr::left_join(dplyr::filter(state_year, year == y), by = c("admin1_id","state_name")) |>

dplyr::mutate(events = tidyr::replace_na(events, 0)) |>

dplyr::arrange(match(admin1_id, ng_admin1$admin1_id))

x <- scale(sf::st_drop_geometry(dat)$events)[,1]

gi <- spdep::localG(x, ng_listw, zero.policy = TRUE)

dat$gi_z <- as.numeric(gi)

dat$hot_flag <- dplyr::case_when(

dat$gi_z >= z_cut ~ "Hotspot",

dat$gi_z <= -z_cut ~ "Cold spot",

TRUE ~ "Neutral"

)

gi_results[[as.character(y)]] <- dat |> sf::st_drop_geometry() |>

dplyr::select(admin1_id, state_name, gi_z, hot_flag)

hotshare <- c(hotshare, mean(dat$hot_flag == "Hotspot") * 100)

}

gi_tbl <- dplyr::bind_rows(lapply(names(gi_results), function(y){

gi_results[[y]] |> dplyr::mutate(year = as.integer(y))

}))

readr::write_csv(gi_tbl, "output/local_gi_by_state_year.csv")

hot_trends <- tibble::tibble(year = years, hotspot_prevalence = hotshare)

readr::write_csv(hot_trends, "output/hotspot_trends.csv")

# ---- Figures -----------------------------------------------------------------

tmap::tmap_mode("plot")

# Figure 1: Local Gi* panels (2010, 2014, 2018, 2024)

years_fig1 <- c(2010, 2014, 2018, 2024)

maps_list <- lapply(years_fig1, function(y){

dat <- gi_results[[as.character(y)]]

if (is.null(dat)) return(NULL)

ng_admin1 |>

dplyr::left_join(dat, by = c("admin1_id","state_name")) |>

dplyr::mutate(year = y)

})

maps_list <- Filter(Negate(is.null), maps_list)

map_df <- do.call(rbind, maps_list) |>

dplyr::mutate(hot_flag = factor(hot_flag, levels = c("Cold spot","Neutral","Hotspot")))

fig1 <- tm_shape(map_df) +

tm_polygons(

fill = "hot_flag",

fill.scale = tm_scale(values = c("#2c7bb6","#d9d9d9","#d7191c")),

col = "gray30", lwd = 0.3,

fill.legend = tm_legend(title = "Gi* class")

) +

tm_facets(by = "year", ncol = 2) +

tm_layout(legend.outside = TRUE)

tmap::tmap_save(fig1, "output/figure_1_hotspots_panels.png", width = 2200, height = 1600, dpi = 220)

# Figure 2: Hotspot prevalence time series

fig2 <- ggplot(hot_trends, aes(year, hotspot_prevalence)) +

geom_line() + geom_point() +

labs(x = "Year", y = "% states that are hotspots",

title = paste0("Hotspot prevalence (Gi* |z| ≥ ", z_cut, "), 2010–2024")) +

theme_minimal(base_size = 12)

ggsave("output/figure_2_hotspot_prevalence.png", fig2, width = 8, height = 4.5, dpi = 220)

# Figure 3: 2018 DTP3 overlay with hotspot outlines (DTP3 CSV now guaranteed)

dtp3_2018 <- readr::read_csv(dtp3_path, show_col_types = FALSE) |>

janitor::clean_names() |>

dplyr::mutate(state_name = stringr::str_to_title(state_name)) |>

dplyr::mutate(state_name = dplyr::recode(state_name, "Nasarawa" = "Nassarawa"))

gi2018 <- dplyr::filter(gi_tbl, year == 2018) |>

dplyr::select(admin1_id, state_name, gi_z, hot_flag)

ng_2018 <- ng_admin1 |>

dplyr::left_join(gi2018, by = c("admin1_id","state_name")) |>

dplyr::left_join(dtp3_2018, by = "state_name") |>

dplyr::mutate(

outline_col = ifelse(hot_flag == "Hotspot", "red3", "gray40"),

outline_lwd = ifelse(hot_flag == "Hotspot", 2, 0.5)

)

fig3 <- tm_shape(ng_2018) +

tm_polygons(

fill = "dtp3",

fill.legend = tm_legend(title = "DTP3 coverage (2018)")

) +

tm_shape(ng_2018) + tm_borders(col = "outline_col", lwd = "outline_lwd") +

tm_layout(legend.outside = TRUE)

tmap::tmap_save(fig3, "output/figure_3_dtp3_overlay_hotspots_2018.png",

width = 1600, height = 1200, dpi = 220)

tmap::tmap_save(fig3, "output/figure_3_dtp3_overlay_hotspots_2018.jpg",

width = 1600, height = 1200, dpi = 220)

tmap::tmap_save(fig3, "output/figure_3_dtp3_overlay_hotspots_2018.pdf",

width = 10, height = 7.5, units = "in")

# ---- Core tabulations saved as CSV -------------------------------------------

events_by_year <- state_year |>

dplyr::group_by(year) |>

dplyr::summarise(

states_reporting = dplyr::n_distinct(admin1_id),

total_events = sum(events, na.rm = TRUE),

median_events_state = median(events, na.rm = TRUE),

iqr_events_state = IQR(events, na.rm = TRUE),

.groups = "drop"

)

readr::write_csv(events_by_year, "output/tables/table_2a_events_by_year.csv")

dtp3_summary <- readr::read_csv(dtp3_path, show_col_types = FALSE) |>

janitor::clean_names() |>

dplyr::summarise(

n_states = dplyr::n(),

mean_dtp3 = mean(dtp3, na.rm = TRUE),

median_dtp3 = median(dtp3, na.rm = TRUE),

min_dtp3 = min(dtp3, na.rm = TRUE),

max_dtp3 = max(dtp3, na.rm = TRUE)

)

readr::write_csv(dtp3_summary, "output/tables/table_2b_dtp3_summary_2018.csv")

# Moran’s I table for reproducibility (numeric)

readr::write_csv(global_morans, "output/tables/table_3_morans_i.csv")

# Hotspot state lists (for Table 4 downstream)

hot_list <- gi_tbl |>

dplyr::filter(hot_flag == "Hotspot") |>

dplyr::arrange(year, state_name) |>

dplyr::group_by(year) |>

dplyr::summarise(

n_hotspots = dplyr::n(),

hotspot_states = paste(state_name, collapse = "; "),

.groups = "drop"

)

readr::write_csv(hot_list, "output/tables/hotspot_states_by_year.csv")

hot_list_panels <- hot_list |> dplyr::filter(year %in% c(2010, 2014, 2018, 2024))

readr::write_csv(hot_list_panels, "output/tables/hotspot_states_panel_years.csv")

# ---- End ---------------------------------------------------------------------
